# 1 Trade-off between competition ability and invulnerability to 2 predation in marine microbes; protist grazing versus viral 3 lysis effects

4 Jinny Wu Yang<sup>1,2</sup>, Feng-Hsun Chang<sup>2</sup>, Yi-Chun Yeh<sup>3</sup>, An-Yi Tsai<sup>4</sup>, Kuo-Ping  
5 Chiang<sup>4</sup>, Fuh-Kwo Shiah<sup>2,5</sup>, Gwo-Ching Gong<sup>4</sup>, Chih-hao Hsieh<sup>2,5,6,7</sup>

6  
7 <sup>1</sup> *Ecology and Evolutionary Biology, University of Michigan, Ann Arbor, Michigan,*  
8 *USA;* <sup>2</sup> *Institute of Oceanography, National Taiwan University, Taipei, Taiwan;*  
9 <sup>3</sup> *Division of Marine and Environmental Biology, University of South California, CA,*  
10 *USA;* <sup>4</sup> *Institute of Marine Environment and Ecology and Center of Excellence for the*  
11 *Oceans, National Taiwan Ocean University, Keelung, Taiwan;* <sup>5</sup> *Research Center for*  
12 *Environmental Changes, Academia Sinica, Taipei 115, Taiwan;* <sup>6</sup> *Institute of Ecology*  
13 *and Evolutionary Biology, Department of Life Science, National Taiwan University,*  
14 *Taipei, Taiwan;* <sup>7</sup> *National Center for Theoretical Sciences, Taipei, Taiwan*

15 Correspondence:

16 Chih-hao Hsieh

17 Institute of Oceanography, National Taiwan University, Taipei 10617, Taiwan.

18 Email: [chsieh@ntu.edu.tw](mailto:chsieh@ntu.edu.tw)

19

20 Running title: Competitiveness-invulnerability trade-off in marine bacterial  
21 communities

## 22 **Abstract**

23       Trade-offs between competition ability and invulnerability to predation are  
 24 important mechanisms explaining how predation promotes bacterial diversity.  
 25 However, existence of these trade-offs has apparently not been investigated in natural  
 26 marine bacterial communities. Here, we address this question with growth-based  
 27 measurements for each marine bacterial taxon by conducting on-board dilution  
 28 experiments to manipulate predation pressure and using high-throughput sequencing  
 29 to assess the response of bacterial communities. We determined that bacterial taxa  
 30 with a higher predation-free growth rate were accompanied with higher predation-  
 31 caused mortality, supporting existence of competitiveness-invulnerability trade-off.  
 32 This trade-off was stronger and more consistent under viral lysis than protist grazing.  
 33 In addition, predation generally flattened out the rank-abundance distribution and  
 34 increased the evenness and richness of the bacterial community. These findings  
 35 supported the “Kill-the-Winner” hypothesis. All experiments supported a significant  
 36 competitiveness-invulnerability trade-off, but there was substantial variation among  
 37 bacterial communities in response to predation across experiments conducted in  
 38 various sites and seasons. Therefore, we inferred that the Kill-the-Winner hypothesis  
 39 is important but likely not the only deterministic mechanism explaining how  
 40 predation shapes bacterial assemblages in natural marine systems.

## 41 **Introduction**

42 Marine microbes, the foundation of marine food-webs, dominate biogeochemical  
43 cycles and regulate nutrient and energy flows in marine systems [1, 2, 3, 4, 5]. Also,  
44 microbial diversity is widely suggested as a critical index reflecting or determining  
45 marine ecosystem functioning [3, 5, 6]. Mechanisms shaping marine microbial  
46 diversity have been intensively studied, with an emphasis on abiotic mechanisms such  
47 as environmental productivity or hydrological factors [7, 8, 9]. Biotic mechanisms  
48 involving interactions within a community or across trophic levels are critical in  
49 shaping marine microbial diversity [10, 11, 12] but are relatively less explored.

50 Niche trade-off, one of the most common biotic mechanisms essential for species  
51 coexistence [13, 14, 15, 16, 17], occurs when species specialize in a certain trait at the  
52 cost of another trait. Characterizing trade-offs in microbial species gives insights into  
53 mechanistic understandings of their community organization. However, our  
54 understanding is mostly confined to the trade-off between species' ability to acquire  
55 various nutrients [17, 18]. Here, we view trade-off in another context, namely the  
56 trade-off between species' competition ability and their invulnerability to predation  
57 (hereafter termed competitiveness-invulnerability trade-off).

58 In microbes, the competitiveness-invulnerability trade-off is more widely known  
59 as the Kill-the-Winner hypothesis: competitively superior prey, the "winners," have  
60 higher mortality caused by predation so that inferior competitors can escape from  
61 competition exclusion, thereby promoting species coexistence [15]. Competitive  
62 superiority can come from species' high growth rates and/or their ability to maintain  
63 high abundance. For example, bacteria with high density of certain cell-surface  
64 receptors can also have higher cellular functions promoting rapid growth rate, but  
65 increased susceptibility to viral infection [19, 20]. In addition, developing growth-  
66 competitive mechanisms would come at the cost of low predation avoidance or  
67 defensive mechanisms due to genetic constraints [15, 21]. The competitiveness-  
68 invulnerability trade-off, or Kill-the-Winner hypothesis, is a mechanism to explain  
69 how predation can promote microbial diversity in the field [21, 22, 23, 24, 25].  
70 However, there is apparently a lack of evidence in natural systems to demonstrate its  
71 occurrence and how it may affect marine bacterial diversity.

72 In this study, we describe the competitiveness of bacteria as their predation-free  
73 growth rate (growth-based competitiveness) and initial density (density-based

74 competitiveness). Invulnerability to predation is regarded as a generic term including  
75 protist grazing and viral lysis, the major cause of mortality and selection forces  
76 affecting bacterial community diversity and composition [25, 26, 27, 28, 29].  
77 Specifically, we coupled dilution experiments and high-throughput sequencing  
78 techniques to estimate the predation-free growth rate and the growth rate under protist  
79 grazing and viral lysis for each bacterial taxon. With these estimates, we tested the  
80 first hypothesis that bacteria's competitiveness is negatively associated with their  
81 invulnerability to predation due to the occurrence of competitiveness-invulnerability  
82 trade-off in marine bacterial communities (Hypothesis I). Based on this hypothesis,  
83 we expect the bacterial taxon with a higher growth-based competitiveness, i.e.,  
84 predation-free growth rate, would have higher mortality caused by protist grazing  
85 (Prediction 1) or viral lysis (Prediction 2). Furthermore, we also expect the bacterial  
86 taxon with higher density-based competitiveness, i.e., initial density, would have  
87 higher mortality caused by protist grazing (Prediction 3) and viral lysis (Prediction 4).  
88 Our second hypothesis is that due to the occurrence of competitiveness-  
89 invulnerability trade-off, stronger predation pressure increases bacterial diversity  
90 (Hypothesis II). This is because predation should alleviate competitive exclusion by  
91 suppressing highly competitive species. To test this hypothesis, we examined how  
92 bacterial rank-abundance distribution, evenness and richness responded to increasing  
93 predation pressure, namely protist grazing, viral lysis, or both. Under the occurrence  
94 of competitiveness-invulnerability trade-off (where Hypothesis I is supported), we  
95 expected that higher predation pressures lead to a flattened rank-abundance  
96 distribution, higher evenness (lower dominance by a small number of species in the  
97 community; Prediction 5) and higher richness (Prediction 6) of the bacterial  
98 community.

## 99     **Results**

### 100     *Competitiveness-invulnerability trade-off in marine bacterial community*

101         The bacterial predator-free growth rate was negatively correlated with its  
 102     invulnerability to predation, regardless of under protist grazing or viral lysis, as  
 103     shown in LMM analysis (both  $p < 0.001$ ; Table 1). These results supported the  
 104     occurrence of competitiveness-invulnerability trade-off driven by protist grazing and  
 105     viral lysis, respectively (Prediction 1 and 2 supported). In addition, this trade-off was  
 106     stronger under viral lysis than protist grazing (with LMM estimates regression slope =  
 107     -0.11 and -0.027, respectively). The conclusion was generally the same when  
 108     examining each experiment separately: Only five of seven experiments had a  
 109     significant growth-based competitiveness-invulnerability trade-off under protist  
 110     grazing; in comparison, this trade-off was apparent in all seven experiments when  
 111     under viral lysis (Figure 1). The results of the permutation test also supported our  
 112     conclusion (Table S3). Our findings indicated that viral lysis was a stronger and more  
 113     consistent driving force on growth-based competitiveness-invulnerability trade-off  
 114     than protist grazing.

115         On the contrary, we did not identify a consistent relationship between density-  
 116     based competitiveness, i.e., initial density, and invulnerability to predation. LMM  
 117     analysis across seven experiments indicated that bacterial initial density exhibited a  
 118     significant positive correlation with the invulnerability to protist grazing ( $LMM-p$   
 119      $< 0.001$ , Table 1). However, when examining each experiment separately under protist  
 120     grazing, there were only positive and no relationships (Figure 2 and Figure S4).  
 121     Therefore, a density-based competitiveness-invulnerability trade-off under protist  
 122     grazing was not observed in our system (Prediction 3 not supported). Despite a  
 123     significantly negative correlation between density-based competitiveness and  
 124     invulnerability to viral lysis in LMM ( $LMM-p < 0.001$ ) (Table 1), only three sets of  
 125     experiments had the consistent and weak relationship (Pearson's correlation  
 126     coefficient = -0.07, -0.17, and -0.14,  $p$  value = 0.04,  $< 0.001$  and  $< 0.001$ , for Figure 2h,  
 127     2i and, 2m, respectively). Therefore, we were not able to make a clear conclusion of  
 128     the existence of this density-based competitiveness-invulnerability trade-off under  
 129     viral lysis (Prediction 4 not supported).

130

### 131     *Predation effect on bacterial diversity*

Here, we explore how bacterial diversity responded to three types of predation pressures, respectively: (i) protists+viruses effect; (ii) protists effect; and (iii) viruses effect. The bacterial rank-abundance distribution (RAD) decay coefficient decreased ( $LMM-p < 0.001$ ) and evenness increased ( $LMM-p < 0.001$ ) when protists+viruses effect was increased. Similarly, when increasing only viruses effect, RAD decay coefficient decreased ( $LMM-p = 0.012$ ) and evenness increased ( $LMM-p = 0.024$ ). However, increasing only protists effect did not significantly change RAD decay coefficient and evenness ( $LMM-p = 0.335$  and  $0.237$ ).

Bacterial richness increased when protists+viruses effect increased ( $LMM-p = 0.009$ ) and when only protists effect was increased ( $LMM-p = 0.004$ ). However, increasing only viruses effect did not change bacterial richness ( $LMM-p = 0.264$ ). Therefore, Predictions 5 and 6 were only partially supported because protist grazing exhibited a more deterministic effect on bacterial richness whereas viral lysis had a major effect on bacterial RAD and evenness. When two predation pressures, i.e., both protist grazing and viral lysis, were combined, they increased bacterial diversity.

## Discussion

*The growth-based competitiveness-invulnerability trade-off in marine bacterial communities*

Bacterial taxa with a higher predation-free growth rate had higher predation-caused mortality (Table 1 and Figure 1), indicating the presence of growth-based competitiveness-invulnerability trade-off in marine bacterial communities (supporting the Kill-the-Winner hypothesis). This finding was consistent with most studies inferring a possible competitiveness-invulnerability trade-off in marine microbes [22, 23, 24, 25, 26, 45]. Here, apparently for the first time, we obtained growth-based estimates on each bacterial taxon in field experiments to further explore the existence of competitiveness-invulnerability trade-offs in marine bacterial communities. Our findings provided empirical evidence supporting the Kill-the-Winner hypothesis that has been widely regarded as an important mechanism determining marine microbial assemblages and the performance of many ecosystem functions, but hitherto rarely verified in natural marine systems.

Furthermore, we inferred that viral lysis, and not protist grazing, was the major driver of the Kill-the-Winner mechanism in marine bacterial communities. This was

supported by a strong and consistent growth-based competitive-invulnerability trade-off under viral lysis whereas this trade-off was weak or absent in some experiments when predation was contributed by protists grazing (Table 1 and Figure 1). Marine viruses are generally highly host-specific [21]. In empirical studies, virus-host interactions had a strong dependence on host growth rate [45]. Furthermore, there was a suggestion of higher taxonomic specificity in virus–bacteria relationships than protist–bacteria relationships [46]. Moreover, products released in the environment from viral lysis can promote growth of weak bacterial competitors due to increased nutrient availability [30, 47], which may further enhance the competitiveness-invulnerability trade-off. In contrast, marine protists are generally known to exploit a large spectrum of bacterial species [48, 49]. Therefore, a protist community may perform weak species selection on their prey when the proportion of specialist grazers in the community is low. In addition, specialist protists’ grazing can be size- or speed-selective [50, 51, 52] which may or may not be correlated to the bacterial predation-free growth rate examined in the present study. As such, contributions from “Kill-the-Winner” to the overall grazing selection on a bacterial community may be masked or weakened as a variety of selection occurs simultaneously.

#### *The density-based competitiveness-invulnerability trade-off in marine bacterial communities*

Our findings did not support the existence of the competitiveness-invulnerability trade-off when taking bacterial initial density as a proxy to its competitiveness, regardless of whether predation was by protist grazing or viral lysis. This conclusion was inconsistent with prior studies that described viral infections being highly dependent on host density [25, 53], and species of protists that are specialized on the dominant bacterial species [54]. However, most previous studies were well-controlled laboratory experiments, whereas our results reflected the complexity of the natural system that would mask the density-based “Kill-the-Winner” in the present study.

Moreover, contrary to our predictions, the initially abundant bacterial species had relatively less predation-caused mortality in several experiments (Figure 2). Given this, we explained our findings from the perspective that full predation can best

maintain bacterial community structure. That is, a weakened predation effect would result in decreased/increased relative abundance of initially abundant/rare bacterial taxa. This may be because our initial bacterial communities were collected from the field; therefore, the initial density of each bacterial taxon is the consequence after full predation selection. Consequently, dominant species could be both slower growing and more grazer/viruses defensive, as reported [24]. We thus acknowledge that our finding of no evidence to support density-based competitiveness-invulnerability trade-off may have been due to the limitations of our experimental settings; instead, our findings reflected that predation has a role in maintaining marine bacterial community structure. This was supported by the results where bacterial composition of the initial community was the closest to the composition incubated under a full predation effect (Figure S4).

#### *Predation effects on bacterial rank-abundance-distribution, evenness, and richness*

When protist and virus density were increased together, there was a flattened bacterial rank-abundance distribution, as well as higher evenness and richness. These results were consistent with the expected consequences of the competitiveness-invulnerability trade-off in bacterial communities, where the predation effect can suppress growth of strong bacterial competitors that weakens the species exclusion effect from the competition. Although it is widely believed that predation is an important force shaping marine microbial diversity, whether it follows the often-cited Kill-the-Winner hypothesis remains unverified in natural systems. Here, our findings bridged the gap between the existence of competitiveness-invulnerability trade-off and predation-promoting effect on marine microbial diversity.

However, when protists were manipulated alone, there was no effect on bacterial RAD and evenness (Figure 3-4). One possible explanation may be that diluting protists alone could not be enough to change the strength of competitiveness-invulnerability trade-off and so as to affect bacterial RAD and evenness. Indeed, although in our study protist grazing generally preferred the fast-growing bacterial winner, this pattern was not consistent across experiments and the effect was relatively weak in comparison to viral lysis (Table 1 and Figure 1-2).

Nevertheless, bacterial richness increased with the increased protist grazing effect (Figure 5). Therefore, we speculated that protist grazing would maintain



bacterial richness through other mechanisms rather than through its weak preference on fast-growing prey. For example, predation by generalist protists would suppress growth of overall bacterial biomass, allowing more remaining resources in the environment and supporting species co-existence.

On the contrary, when the viral effect increased, bacterial RAD and evenness became flatter and higher, respectively, whereas bacterial richness did not change. Therefore, we inferred that viral lysis had a critical role in controlling the dominance of the strong competitor; however, weakening the viral-driven competitiveness-invulnerability trade-off did not necessarily strengthen competition exclusion and lead to bacterial taxon loss.

We also acknowledge that we may have underestimated the viral lysis effects on bacterial diversity by subtracting the diversity indices of protists-manipulated treatment from protists+viruses-manipulated treatment. This concern was due to potential antagonistic interactions between protists and viruses, as suggested in previous studies, for instance, the competition on the same bacteria pools or intrigued predation where protists graze on free-living virus and viral-infected bacteria [55, 56, 57]. This would also explain why many experiments exhibited no significant viral lysis effect on bacterial diversity (Figure 3-5). Experiments manipulating only viral lysis effect would provide better evidence [23, 24], but are technically challenging.

In addition, our seven experiments were conducted in different sites or seasons, and in many, there was no predation effect on bacterial diversity (Figure 3-5). Perhaps predation effects were weakened or masked by other environmental factors [7, 8, 9]. Furthermore, we incubated marine microbes under *in-situ* temperature and in a closed system, without nutrient and particle exchange. Low temperatures, depleted nutrients, and accumulated metabolic waste can occur and weaken bacterial productivity to exhibit a significant growth response to predation. Yet, there was no apparent relationship between environment nutrient concentration, bacterial initial abundance, and richness versus how predation affects bacterial diversity (Table S2), perhaps, owing to our limited number of experimental sets.

Finally, we also acknowledge that a potential “bottle effect” may have existed in our experiments. The bottle effect can result in a bacterial community change due to an incubation environment in the bottles that may weaken or mask bacterial community responses to the manipulated predation effect, as suggested [58, 59]. To

exam a potential bottle effect in the present experiment, we investigated the ranking of ASVs (ranked by relative abundance) in  $T_0$  versus  $T_{12}$  when without predation manipulation (under 100% predation dilution factor, [Figure S5](#)). The ASVs with higher ranking at  $T_0$  generally had a higher ranking in  $T_{12}$  when without predation manipulation, indicating that, generally, ASVs ranking was not dramatically influenced by the incubation environment ([Figure S5](#)). Nevertheless, some ASVs did have a large ranking shift, potentially caused by a bottle effect. For a better quantitative examination, we analyzed the degree of ranking change for each ASV by calculating  $|T_{0-Rank}/T_{0-MaxRank} - T_{12-100\%-Rank}/T_{12-100\%-MaxRank}|$  for each ASV; where  $T_{0-Rank}$  and  $T_{12-100\%-Rank}$  are the ranking at  $T_0$  and  $T_{12}$ ; and  $T_{0-MaxRank}$  and  $T_{12-100\%-MaxRank}$  are the maximum ranking at  $T_0$  and at  $T_{12}$ , respectively. When consider all ASVs, only 9.9% of ASVs had < 10% ranking change; nevertheless, in the top-100 rank ASVs (based on relative abundance across all experiments) which contained 86% of total reads, 87 ASVs had <10% of ranking change. Therefore, we concluded that bottle effects potentially existed and influenced bacterial community components; however, bottle effects did not alter the major component of most bacterial abundance in our study. In addition, even if a bottle effect caused a large ranking shift in rare bacterial taxa, it did not mask the overall bacterial community responses to the manipulated predation effects.

#### *Predation effects on bacterial composition*

A final check was conducted to examine if the Bray-Curtis dissimilarity between bacterial communities at  $T_{12}$  and  $T_0$  varied under different predation dilution factors. The Bray-Curtis dissimilarities decreased with predation, regardless of protists-manipulated or protists+viruses-manipulated treatments in LMM analysis ([Figure S4](#)). This finding agreed with most studies, suggesting that predation maintained bacterial composition [15, 60].

## **Materials and methods**

### *Study sites and predation manipulation experiments*

In total, seven sets of predation manipulation experiments were conducted in April 2014, October and July 2015, and May 2016 at two stations in the East China Sea ([Figure S1](#)). Bacterial communities were collected at the surface layer (3 to 5 m)

by Go-Flo bottles mounted on a CTD-equipped rosette (Sea-Bird Electronics, Bellevue, WA, USA). For each set of predation manipulation experiments, three types of seawater samples were prepared: (i) macro-plankton-free (20- $\mu$ m filtered); (ii) protists- and bacteria-free (0.22- $\mu$ m filtered); and (iii) particle-free seawater (30-kDa filtered). These three types of seawater were used for creating two combinations of predation manipulation treatments: (i) Protists-manipulated (macro-plankton-free seawater diluted by grazing- and bacteria-free water) and (ii) Protists+viruses-manipulated (macro-plankton-free seawater diluted by particle-free seawater). This predation manipulation technique followed previous studies that assumed filtration and manipulation processes do not affect dissolved-organic matter and bacterial growth, but decrease bacterial mortality caused by protists grazing and viral lysis due to decreased encounter rates between bacteria and predators [23, 31, 32, 33]. For each combination of predation manipulation, a 4-point dilution series was generated, with 25, 50, 75 and 100% of the original predation effect remaining (predation dilution factors) (Figure S2). The mixtures were incubated for 12 h in duplicate in sterilized 500-ml polycarbonate bottles at *in situ* temperature in a cabin, with water flow taken on board from the sea surface layer and under natural light. For bacterial enumeration samples, 2 ml of seawater from each 500-ml bottle were collected at the beginning ( $T_0$ ) and after 12-h incubation ( $T_{12}$ ) and fixed by paraformaldehyde solution with a final concentration 0.2% [34]. Therefore, 32 samples were collected from each experiment, which contains two predation manipulation treatments (protists-manipulated and viruses-manipulated treatments) with four predation dilution factors in duplicates collected at  $T_0$  and  $T_{12}$ . In total, 224 samples were collected in seven experiments.

For 16S rDNA sequencing samples, ~ 10 L of macro-plankton-free seawater (20- $\mu$ m filtered) representing the community composition in each experiment at  $T_0$ , and the rest of the seawater in each of the 16 half-litter bottles (two predation manipulation treatments with four predation dilution factors in duplicates) at  $T_{12}$  (representing the community composition after 12-h incubation), were filtered through 0.2- $\mu$ m pore size polycarbonate membranes, respectively. Consequently, 17 community samples were collected from each experiment; thus, a total of 119 community samples were collected from seven experiments. All seawater and filter

329 samples were frozen with liquid nitrogen onboard and stored at -80°C until the next  
330 process.

331

### 332 *Bacteria enumeration, DNA extraction, PCR, sequencing and bioinformatics*

333 To enumerate bacterial, 2 ml of paraformaldehyde-fixed seawater samples was  
334 stained with SYBR green (Molecular Probes Inc., USA) for 15 min in the dark and  
335 enumerated with a FACS Aria flow cytometer (Becton Dickinson, USA).

336 For 16S rRNA gene sequencing, total DNA was extracted from the 0.2-µm pore  
337 size membranes using DNeasy PowerWater Kit (Qiagen, Hilden, Germany) according  
338 to manufacturer's instructions. For generating libraries, DNA extracts from the  
339 membranes were used as templates of polymerase chain reaction (PCR) to amplify the  
340 V5–V6 region [35] of 16S rDNA, followed by a second PCR to generate amplicons  
341 with unique dual-index for each sample. However, we failed to amplify one 16S  
342 rDNA sample (the 25% predation dilution factor under the protists-manipulated  
343 treatment in the experiment 2015JulSt1) in the first PCR; thus, only 118 samples  
344 proceeded to the next step. PCR purification was done after the first and second PCRs  
345 using Agencourt AMPure XP beads (Beckman Coulter, Indianapolis, Indiana). The  
346 purified DNA samples were pooled with approximately equal DNA quantity  
347 measured with Qubit dsDNA BR Assay Kit (Thermo Fisher Scientific, Waltham,  
348 Massachusetts; see [Supplementary Information](#) for details). Sequencing was carried  
349 out using the Illumina MiSeq platform, producing 2 × 300 bp paired-end reads. Raw  
350 sequence data were deposited in the NCBI Sequence Read Archive (SRA) under  
351 accession number PRJNA749329.

352 Raw sequences were processed using the Quantitative Insights Into Microbial  
353 Ecology 2 (QIIME 2 v2018.8) pipeline [36], following a protocol that processed with  
354 DADA2 with standard parameters [37] for removing primers, reads trimming  
355 (forward and reverse reads were truncated reads at positions 210 and 140 where  
356 quality score start to crash below 25, respectively), errors correction, merging read  
357 pairs, removing possible PCR chimeras (consensus method), and generating amplicon  
358 sequence variant (ASV) representative sequences and tables. To identify and remove  
359 potential mitochondria and chloroplast ASV, representative sequences were classified  
360 with a Naive Bayes classifier [38] fitted with 16S rRNA gene sequences extracted  
361 from SILVA v132 database [39] based on the PCR primers used. Singleton ASVs

(which may be created when merging paired-end sequences) across all experiments were removed.

364

*ASV table rarefaction and relative abundance estimates for the competitiveness-invulnerability trade-off analysis*

The singleton-free ASV table was separated into seven sets of experiments and rarefied based on the lowest number of reads among all communities in each experiment (Table S1). If the relative abundance of the bacterial taxon (each ASV) in a community was 0, we replaced it with the relative abundance using the ASV table prior to rarefaction in that community. Furthermore, if the relative abundance remained 0 in the ASV table prior to rarefaction, we set it as  $10^{-8}$ . This value was determined according to the findings that the smallest relative abundance before rarefaction for each of the seven sets of experiments was  $\sim 10^{-7}$  (Table S2). A sensitivity test on setting the zero relative abundance in both rarefied and non-rarefied ASV table as  $10^{-7}$  was also conducted; results indicated a consistent conclusion on the competitiveness-invulnerability relationship (Table S2). This adjustment on zero relative abundance is necessary to alleviate impacts from sampling effects that would otherwise neglect responses of bacterial taxa susceptible to predation manipulation, but extremely rare. For example, potential predation-susceptible taxa might be initially too rare to be detected, but subsequently appear after 12-h incubation under diluted predation treatments (i.e., 25, 50 and 75% diluted treatments, ranging from 56.9 to 80.9% of total ASVs with 5.3 to 19% of total reads across experiments). Alternatively, the bacterial taxa existed initially but was not detected after 12 h under a diluted predation effect (<0.6% of ASVs with < 0.001% of total reads across all experiments, Table S3), i.e., the taxa are potentially predation-defenders but susceptible to competition.

388

*Estimates of competitiveness and invulnerability to predation of each bacterial ASV*

**The initial density** of each bacterial ASV was calculated by multiplying its relative abundance (estimated from 16s rDNA sequencing) and the mean of the density of the whole community (enumerated with flow cytometry) at  $T_0$ . The relationship between *per-capita net growth rate* versus *predation dilution factors* (**PNGR-PDF**) were analyzed for each bacterial ASV (hereafter, the PNGR-PDF

relationship) for both predation manipulation treatments (protists-manipulated and protists+viruses-manipulated) (Figure S3). The *per-capita net growth rate* ( $r$ ) was estimated using bacterial population size initially ( $N_0$ ) and after 12-h incubation ( $N_{12}$ ) where  $r = \ln(N_{12}/N_0)/(12 \text{ h})$ . This calculation assumes  $r$  does not change with population size with equation:  $N_t = N_0 * re^t$ , where  $N_t$  is the population size at time  $t$  [40, 41]. Bacterial population size was estimated by multiplying the relative abundance and the absolute abundance of the whole community. Two linear regressions of the *PNGR-PDF relationship* for two predation manipulation treatments (with two replicates for each) were analyzed. *Bacterial predation-free growth rate* was estimated as the y-intercept of the PNGR-PDF relationship under the protists+viruses-manipulated treatment. *Bacterial invulnerability to protist grazing* was estimated by the regression slope of PNGR-PDF relationship under the protists-manipulated treatment, indicating the degree of bacterial growth rate in response to increased protist grazing. Finally, *bacterial invulnerability to viral lysis* was calculated by subtracting the protists-manipulated PNGR-PDF regression slope from the protists+viruses-manipulated PNGR-PDF regression slope [31, 33], representing the degree of bacterial growth rate in response to the increased viral lysis effect.

412

### 413 *Bacterial community indices*

414 Here, we investigated three bacterial diversity indices: the decay coefficient of  
415 species rank abundance distribution (RAD), evenness and richness. The decay  
416 coefficient of RAD and evenness were estimated based on the rank-normalized RAD,  
417 through which the single-free ASV tables were scaled by taking the average of 1000  
418 times subsampling with the lowest number of RAD rank (lowest number of species  
419 among communities) at  $T_{12}$  in each experiment and then normalized between 0 and 1  
420 (Table S1) using “RADanalysis” package in R program. This allowed a quantitative  
421 comparison of RAD structures and evenness among communities with controlled  
422 richness [42]. To describe the RAD structure, the RAD decay coefficient was  
423 represented by the estimated decay coefficient obtained from fitting the Zipf model to  
424 the normalized RADs using the “radfit” package in the R program. A community  
425 with a higher RAD decay coefficient indicates that the frequency of species decreases  
426 dramatically along with rank (a steeper RAD) whereas a lower RAD decay coefficient  
427 represents a smaller difference among species frequency (a flatter RAD). Evenness

was estimated using the “*vegan*” package in R program with rank-normalized RAD. Bacterial richness was estimated from the singleton-free ASV tables rarefied at the lowest number of reads among communities at  $T_{12}$  in each experiment (Table S1). Bacterial richness was the number of ASV of each community.

Finally, Bray–Curtis dissimilarity between communities collected at  $T_0$  and  $T_{12}$  was calculated to check predation effects on bacterial species composition. This analysis was done based on the singleton-free ASV tables that were rarefied at the lowest number of reads among all communities in each experiment (Table S1). Bray–Curtis dissimilarities were calculated based on the relative abundance of various ASVs using “*vegan*” package in the R program.

### *Data analyses*

Hypothesis I aimed at investigating the bacterial competitiveness-invulnerability trade-off. For each experiment, we determined linear regression and the Pearson’ correlation coefficient between bacterial competitiveness (as independent variable, for predation-free growth rate and initial abundance, respectively) versus invulnerability to predation (as dependent variable, for mortality caused by protists grazing and viral lysis, respectively). Then, pooling all these relationships across communities, we analyzed competitiveness-invulnerability relationships with a linear mixed-effects model (LMM) considering random intercepts across seven experiments using “*nlme*” package in R, with bacterial competitiveness as independent variable, invulnerability to predation as dependent variable, and experiments as the random effect. Additionally, to detect a potential artifactual slope-intercept relationship when analyzing competitiveness-invulnerability trade-off, a permutation test was conducted. This additional analysis was due to the concern that the estimates of slope (invulnerability to predation) and intercept (predation-free growth rate) were from two closely related regression lines. Specifically, for each predation effect (protists grazing or viral lysis, respectively), a null model was generated using the linear regression estimates with randomly shuffled dependent variables (the invulnerability to predation) across dilution factors while independent variables (predation-free growth rate) remain fixed and was repeated 1000 times. Observed values were statistically tested if significantly different from the mean of null models with Z-score and its p-value.



In Hypothesis II, we analyzed the relationship between predation dilution factors versus the three bacterial diversity indices (RAD decay coefficient, evenness, or richness) after 12-h incubation under three combinations of predation effect (protists+viruses, protists or viruses), respectively. These relationships were analyzed with LMM analysis as well, with predation dilution factors as independent variables, diversity indices as dependent variables, and experiments as the random effect. Three types of predation pressures on bacterial diversity were analyzed: (i) protists+viruses effect; (ii) protists effect; and (iii) viruses effect. Effects from protists and protists+virus were examined from protists-manipulated and protists+viruses-manipulated treatments, respectively. Bacterial diversity estimates under viral lysis effect were obtained by subtracting each diversity estimate in protists-manipulated treatment from each diversity estimate under protists+viruses-manipulated treatment. There are two replicates in each treatment, resulting in four diversity estimates under each viruses-manipulated dilution factors. Finally, we investigated how bacterial composition similarity between initial and 12-h incubation (Bray-Curtis dissimilarity) varied under the four degrees of predation dilution factors, with protists-manipulated and protists+viruses-manipulated treatments. Details of the data analysis and R scripts are provided online (<https://github.com/jinnyyang/Marine-Bacteria-C-I-trade-off>).

479

#### 480 *Environmental variables*

Temperature was recorded by the CTD profiler. Nitrite and nitrate concentrations were measured by the pink dye method, and phosphate concentrations were measured by molybdenum blue, using standard methods [43]. Environmental conditions during the experiments are summarized in Table S4.

485

#### 486 **Acknowledgements**

We thank Ching-Wei Hsu for assistance to conduct experiments and sampling, Hon-Tsen Yu for providing facilities and advice on laboratory work, and Sara Jackrel and Vincent Denef for comments. This work was supported by the National Center for Theoretical Sciences, Foundation for the Advancement of Outstanding Scholarship, and the Ministry of Science and Technology, Taiwan.

492

#### 493 **Competing interests**



494 The authors declare that they have no competing interests.

495

496

## 497     **References**

- 498     1.     Prosser JI, Bohannon BJ, Curtis TP, Ellis RJ, Firestone MK, Freckleton RP,  
499             Green JL, Green LE, Killham K, Osborn AM, Solan M, van der Gast CJ,  
500             Young, JPW. The role of ecological theory in microbial ecology. *Nature*  
501             *Reviews Microbiology*. 2007;5:384–92. doi:10.1038/nrmicro1643.
- 502     2.     Hutchins DA, Fu F. Microorganisms and ocean global change. *Nature*  
503             *Microbiology*. 2017;2:1–11. doi:10.1038/nmicrobiol.2017.58.
- 504     3.     Cavicchioli R, Ripple WJ, Timmis KN, Azam F, Bakken LR, Baylis M,  
505             Behrenfeld MJ, Boetius A, Boyd PW, Classen AT, Crowther TC, Danovaro R,  
506             Foreman CM, Huisman J, Hutchins DA, Jansson JK, Karl DM, Koskella B,  
507             Welch DM, Martiny JB, Moran MA, Orphan VJ, Reay DS, Remais JV, Rich  
508             VI, Singh BK, Stein LY, Stewart FJ, Matthew B. Sullivan MB, van Oppen MJ,  
509             Scott C. Weaver SC, Webb EA, Webster NS. Scientists' warning to humanity:  
510             microorganisms and climate change. *Nature Reviews Microbiology*.  
511             2019;17:569–86. doi:10.1038/s41579-019-0222-5.
- 512     4.     Azam F, Fenchel T, Field JG, Gray J, Meyer-Reil L, Thingstad F. The  
513             ecological role of water-column microbes in the sea. *Marine Ecology Progress*  
514             *Series*. 1983;20:257–63. doi:10.3354/meps010257.
- 515     5.     Hagström A, Azam F, Andersson A, Wikner J, Rassoulzadegan F. Microbial  
516             loop in an oligotrophic pelagic marine ecosystem: possible roles of  
517             cyanobacteria and nanoflagellates in the organic fluxes. *Marine ecology*  
518             *progress series*. Oldendorf. 1988;49:171–78. doi:10.3354/meps049171.
- 519     6.     Fuhrman JA, Cram JA, Needham DM. Marine microbial community dynamics  
520             and their ecological interpretation. *Nature Reviews Microbiology*.  
521             2015;13:133–46. doi:10.1038/nrmicro3417.
- 522     7.     Nogales B, Lanfranconi MP, Piña-Villalonga JM, Bosch R. Anthropogenic  
523             perturbations in marine microbial communities. *FEMS Microbiology Reviews*.  
524             2011;35:275–98. doi:10.1111/j.1574-6976.2010.00248.x.
- 525     8.     Yeh YC, Peres-Neto PR, Huang SW, Lai YC, Tu CY, Shiah FK, Gong GC,  
526             Hsieh CH. Determinism of bacterial metacommunity dynamics in the southern  
527             East China Sea varies depending on hydrography. *Ecography*. 2015;38:198–  
528             212. doi:10.1111/ecog.00986.
- 529     9.     York A. Marine microbial diversity from pole to pole. *Nature Reviews*  
530             *Microbiology*. 2020;18:3. doi:10.1038/s41579-019-0304-4.
- 531     10.     Fuhrman JA. Microbial community structure and its functional implications.  
532             *Nature*. 2009;459:193–99. doi:10.1038/nature08058.
- 533     11.     Ratzke C, Barrere J, Gore J. Strength of species interactions determines  
534             biodiversity and stability in microbial communities. *Nature Ecology &*  
535             *Evolution*. 2020;4:376–383. doi:10.1038/s41559-020-1099-4.

- 536 12. Chang FH, Yang JW, Liu AC, Lu HP, Gong GC, Shiah FK, Hsieh CH.  
537 Community assembly processes as a mechanistic explanation of the predator-  
538 prey diversity relationship in marine microbes. *Frontiers in Marine Science*.  
539 2021;8:601. doi:10.3389/fmars.2021.651565.
- 540 13. Kneitel JM, Chase JM. Trade-offs in community ecology: linking spatial scales  
541 and species coexistence. *Ecology Letters*. 2004;7:69–80. doi:10.1046/j.1461-  
542 0248.2003.00551.x.
- 543 14. Litchman E, Klausmeier CA, Schofield OM, Falkowski PG. The role of  
544 functional traits and trade-offs in structuring phytoplankton communities:  
545 scaling from cellular to ecosystem level. *Ecology Letters*. 2007;10:1170–81.  
546 doi:10.1111/j.1461-0248.2007.01117.x.
- 547 15. Winter C, Bouvier T, bauer MG, Thingstad TF. Trade-offs between competition  
548 and defense specialists among unicellular planktonic organisms: the “killing the  
549 winner” hypothesis revisited. *Microbiology and Molecular Biology Reviews*.  
550 2010;74:42–57. doi:10.1128/MMBR.00034-09.
- 551 16. Thingstad TF. Elements of a theory for the mechanisms controlling abundance,  
552 diversity, and biogeochemical role of lytic bacterial viruses in aquatic systems.  
553 *Limnology and Oceanography*. 2000;45:1320–28.  
554 doi:10.4319/lo.2000.45.6.1320.
- 555 17. Edwards KF, Klausmeier CA, Litchman E. A three-way trade-off maintains  
556 functional diversity under variable resource supply. *The American Naturalist*.  
557 2013;182:786–800. doi:10.1086/673532.
- 558 18. Litchman E, Edwards KF, Klausmeier CA. Microbial resource utilization traits  
559 and trade-offs: implications for community structure, functioning, and  
560 biogeochemical impacts at present and in the future. *Frontiers in Microbiology*.  
561 2015;6:254. doi:10.3389/fmicb.2015.00254.
- 562 19. Lenski RE. Experimental studies of pleiotropy and epistasis in *Escherichia coli*.  
563 I. Variation in competitive fitness among mutants resistant to virus T4.  
564 *Evolution*. 1988;42:425–32. doi:10.1111/j.1558-5646.1988.tb04149.x.
- 565 20. Jessup CM, Bohannan BJ. The shape of an ecological trade-off varies with  
566 environment. *Ecology Letters*. 2008;11:947–59. doi:10.1111/j.1461-  
567 0248.2008.01205.x.
- 568 21. Fuhrman J, Schwalbach M. Viral influence on aquatic bacterial communities.  
569 *The Biological Bulletin*. 2003;204:192–5. doi:10.2307/1543557.
- 570 22. Zhang R, Weinbauer MG, Qian PY. Viruses and flagellates sustain apparent  
571 richness and reduce biomass accumulation of bacterioplankton in coastal marine  
572 waters. *Environmental Microbiology*. 2007;9:3008–18. doi:10.1111/j.1462-  
573 2920.2007.01410.x.
- 574 23. Bonilla-Findji O, Herndl GJ, Gattuso JP, Weinbauer MG. Viral and flagellate  
575 control of prokaryotic production and community structure in off-shore

- 576 Mediterranean waters. *Applied and Environmental Microbiology*.  
577 2009;75:4801–12. doi:10.1128/AEM.01376-08.
- 578 24. Cram JA, Parada AE, Fuhrman JA. Dilution reveals how viral lysis and grazing  
579 shape microbial communities. *Limnology and Oceanography*. 2016;61:889–  
580 905. doi:10.1002/lno.10259.
- 581 25. Fuhrman JA, Noble RT. Causative agents of bacterial mortality and the  
582 consequences to marine food webs. *Microbial Biosystems: New Frontiers*.  
583 2000:145–51.
- 584 26. Suttle CA. Marine viruses—major players in the global ecosystem. *Nature*  
585 *Reviews Microbiology*. 2007;5:801–12. doi:10.1038/nrmicro1750.
- 586 27. Bouvier T, Del Giorgio PA. Key role of selective viral-induced mortality in  
587 determining marine bacterial community composition. *Environmental*  
588 *Microbiology*. 2007;9:287–97. doi:10.1111/j.1462-2920.2006.01137.x.
- 589 28. Unrein F, Massana R, Alonso-Sáez L, Gasol JM. Significant year-round effect  
590 of small mixotrophic flagellates on bacterioplankton in an oligotrophic coastal  
591 system. *Limnology and Oceanography*. 2007;52:456–69.  
592 doi:10.4319/LO.2007.52.1.0456.
- 593 29. Schmoker C, Hernández-León S, Calbet A. Microzooplankton grazing in the  
594 oceans: impacts, data variability, knowledge gaps and future directions. *Journal*  
595 *of Plankton Research*. 2013;35:691–706. doi:10.1093/plankt/fbt023
- 596 30. Zhang R, Li Y, Yan W, Wang Y, Cai L, Luo T, Li H, Weinbauer MG, Jiao N.  
597 Viral control of biomass and diversity of bacterioplankton in the deep sea.  
598 *Communications Biology*. 2020;3:1–10. doi:10.1038/s42003-020-0974-5.
- 599 31. Evans C, Archer SD, Jacquet S, Wilson WH. Direct estimates of the  
600 contribution of viral lysis and microzooplankton grazing to the decline of a  
601 *Micromonas* spp. population. *Aquatic Microbial Ecology*. 2003;3:207–19.  
602 doi:10.3354/ame030207.
- 603 32. Kimmance SA, Wilson WH, Archer SD. Modified dilution technique to  
604 estimate viral versus grazing mortality of phytoplankton: limitations associated  
605 with method sensitivity in natural waters. *Aquatic Microbial Ecology*.  
606 2007;49:207–22. doi:10.3354/ame01136.
- 607 33. Tsai AY, Gong GC, Hung J. Seasonal variations of virus- and nanoflagellate-  
608 mediated mortality of heterotrophic bacteria in the coastal ecosystem of  
609 subtropical western Pacific. *Biogeosciences*. 2013;10:3055–65. doi:10.5194/bg-  
610 10-3055-2013.
- 611 34. Chung CC, Gong GC, Huang CY, Lin JY, Lin YC. Changes in the  
612 *Synechococcus* assemblage composition at the surface of the East China Sea  
613 due to flooding of the Changjiang river. *Microbial Ecology*. 2015;70:677–88.  
614 doi:10.1007/s00248-015-0608-5.

- 615 35. Cai L, Ye L, Tong AHY, Lok S, Zhang T. Biased diversity metrics revealed by  
616 bacterial 16S pyrotags derived from different primer sets. *PloS One*.  
617 2013;8:e53649. doi:10.1371/journal.pone.0053649.
- 618 36. Bolyen E, Rideout JR, Dillon MR, Bokulich NA, Abnet CC, Al-Ghalith GA, et  
619 al. Reproducible, interactive, scalable and extensible microbiome data science  
620 using QIIME 2. *Nature Biotechnology*. 2019;37:852–57. doi:10.1038/s41587-  
621 019-0209-9.
- 622 37. Callahan BJ, McMurdie PJ, Rosen MJ, Han AW, Johnson AJA, Holmes SP.  
623 DADA2: high-resolution sample inference from Illumina amplicon data. *Nature*  
624 *Methods*. 2016;13:581–83. doi:10.1038/nmeth.3869.
- 625 38. Pedregosa F, Varoquaux G, Gramfort A, Michel V, Thirion B, Grisel O, et al.  
626 *Scikit-learn: Machine learning in Python*. *The Journal of Machine Learning*  
627 *Research*. 2011;12:2825–2830.
- 628 39. Quast C, Pruesse E, Yilmaz P, Gerken J, Schweer T, Yarza P, Peplies J,  
629 Glöckner FO. The SILVA ribosomal RNA gene database project: improved  
630 data processing and web-based tools. *Nucleic Acids Research*. 2012;41:D590–  
631 6. doi:10.1093/nar/gks1219.
- 632 40. Landry M, Hassett R. Estimating the grazing impact of marine micro-  
633 zooplankton. *Marine Biology*. 1982;67:283–88. doi:10.1007/BF00397668.
- 634 41. Salat J, Marrase C. Exponential and linear estimations of grazing on bacteria:  
635 effects of changes in the proportion of marked cells. *Marine Ecology Progress*  
636 *Series*. 1994;104:205. doi: 10.3354/meps104205.
- 637 42. Saeedghalati M, Farahpour F, Budeus B, Lange A, Westendorf AM, Seifert M,  
638 Küppers R, Hoffmann D. Quantitative comparison of abundance structures of  
639 generalized communities: from B-cell receptor repertoires to microbiomes.  
640 *PLoS Computational Biology*. 2017;13:e1005362.  
641 doi:10.1371/journal.pcbi.1005362.
- 642 43. Gong GC, Wen YH, Wang BW, Liu GJ. Seasonal variation of chlorophyll a  
643 concentration, primary production and environmental conditions in the  
644 subtropical East China Sea. *Deep Sea Research Part II: Topical Studies in*  
645 *Oceanography*. 2003;50:1219–36. doi:10.1016/S0967-0645(03)00019-5.
- 646 44. Storesund JE, Erga SR, Ray JL, Thingstad TF, Sandaa RA. Top-down and  
647 bottom-up control on bacterial diversity in a western Norwegian deep-silled  
648 fjord. *FEMS Microbiology Ecology*. 2015;91:fiv076.  
649 doi:10.1093/femsec/fiv076.
- 650 45. Middelboe M. Bacterial growth rate and marine virus–host dynamics. *Microbial*  
651 *Ecology*. 2000;40:114–24. doi:10.1007/s002480000050.
- 652 46. Chow CET, Kim DY, Sachdeva R, Caron DA, Fuhrman JA. Top-down controls  
653 on bacterial community structure: microbial network analysis of bacteria, T4-

- 654 like viruses and protists. *The ISME journal*. 2014;8:816–29.  
655 doi:10.1038/ismej.20.
- 656 47. Coutinho FH, Silveira CB, Gregoracci GB, Thompson CC, Edwards RA,  
657 Brussaard CP, Dutilh BE, Thompson FL. Marine viruses discovered via  
658 metagenomics shed light on viral strategies throughout the oceans. *Nature*  
659 *Communications*. 2017;8:1–12. doi:10.1038/ncomms15955.
- 660 48. Johnke J, Baron M, de Leeuw M, Kushmaro A, Jurkevitch E, Harms H,  
661 Chatzinotas A. A generalist protist predator enables coexistence in multi-trophic  
662 predator-prey systems containing a phage and the bacterial predator  
663 *bdellovibrio*. *Frontiers in Ecology and Evolution*. 2017;5:124.  
664 doi:10.3389/fevo.2017.00124.
- 665 49. Bjorbækmo MFM, Evenstad A, Røsæg LL, Krabberød AK, Logares R. The  
666 planktonic protist interactome: where do we stand after a century of research?  
667 *The ISME journal*. 2020;14(2):544–59. doi:10.1038/s41396-019-0542-5.
- 668 50. Güde H. The role of grazing on bacteria in plankton succession. *Plankton*  
669 *ecology*. Springer; Heidelberg, Berlin, Germany: 1989. pp. 337–364.
- 670 51. Jürgens K, Matz C. Predation as a shaping force for the phenotypic and  
671 genotypic composition of planktonic bacteria. *Antonie Van Leeuwenhoek*.  
672 2002;81:413–34. doi:10.1023/a:1020505204959.
- 673 52. Batani G, Pérez G, Martínez de la Escalera G, Piccini C, Fazi S. Competition  
674 and protist predation are important regulators of riverine bacterial community  
675 composition and size distribution. *Journal of Freshwater Ecology*. 2016;31:609–  
676 23. doi:10.1080/02705060.2016.1209443.
- 677 53. Maslov S, Sneppen K. Population cycles and species diversity in dynamic Kill-  
678 the-Winner model of microbial ecosystems. *Scientific Reports*. 2017;7:1–8.  
679 doi:10.1038/srep39642.
- 680 54. Bell T, Bonsall MB, Buckling A, Whiteley AS, Goodall T, Griffiths RI. Protists  
681 have divergent effects on bacterial diversity along a productivity gradient.  
682 *Biology Letters*. 2010;6:639–42. doi:10.1098/rsbl.2010.0027.
- 683 55. Miki T, Yamamura N. Intraguild predation reduces bacterial species richness  
684 and loosens the viral loop in aquatic systems: ‘kill the killer of the  
685 winner’ hypothesis. *Aquatic Microbial Ecology*. 2005;40:1–12.  
686 doi:10.3354/AME040001.
- 687 56. Deng L, Krauss S, Feichtmayer J, Hofmann R, Arndt H, Griebler C. Grazing of  
688 heterotrophic flagellates on viruses is driven by feeding behaviour.  
689 *Environmental Microbiology Reports*. 2014;6:325–30. doi:10.1111/1758-  
690 2229.12119.
- 691 57. Bouvy M, Bettarel Y, Bouvier C, Domaizon I, Jacquet S, Le Floc’h E, Montaié  
692 H, Mostajir B, Sime-Ngando T, Torréton JP, Vidussi F, Bouvier T. Trophic  
693 interactions between viruses, bacteria and nanoflagellates under various nutrient

- 694 conditions and simulated climate change. *Environmental Microbiology*.  
695 2011;13:1842–57. doi:10.1111/j.1462-2920.2011.02498.x.
- 696 58. Agis M, Granda A, Dolan JR. A cautionary note: examples of possible  
697 microbial community dynamics in dilution grazing experiments. *Journal of*  
698 *Experimental Marine Biology and Ecology*. 2007;341:176–83.  
699 doi:10.1016/j.jembe.2006.09.002.
- 700 59. Hammes F, Vital M, Egli T. Critical evaluation of the volumetric “bottle effect”  
701 on microbial batch growth. *Applied and Environmental Microbiology*.  
702 2010;76:1278–81. doi:10.1128/AEM.01914-09 .
- 703 60. Schwalbach MS, Hewson I, Fuhrman JA. Viral effects on bacterial community  
704 composition in marine plankton microcosms. *Aquatic Microbial Ecology*.  
705 2004;34:117–27. doi:10.3354/AME034117.
- 706

## Figure and Table legends

708

709 **Table 1.** Results of linear mixed-effect model analysis for competitiveness-  
710 invulnerability trade-off and predation effects on bacterial community indices, with  
711 experiments as the random effect. Bold numbers indicate significant ( $p < 0.05$ )  
712 results.

| Independent variable                             | Dependent variable    | Estimate | Std. Error | <i>p</i> value   |
|--------------------------------------------------|-----------------------|----------|------------|------------------|
| <b>Competitiveness-invulnerability trade-off</b> |                       |          |            |                  |
| Competitiveness                                  | Invulnerability       |          |            |                  |
| Growth-based competitiveness                     | to protist grazing    | -0.027   | 0.002      | <b>&lt;0.001</b> |
|                                                  | to viral lysis        | -0.114   | 0.003      | <b>&lt;0.001</b> |
| Density-based competitiveness                    | to protist grazing    | 0.139    | 0.008      | <b>&lt;0.001</b> |
|                                                  | to viral lysis        | -0.047   | 0.011      | <b>&lt;0.001</b> |
| <b>Predation effect on bacterial community</b>   |                       |          |            |                  |
| Predation effect                                 | Community index       |          |            |                  |
| Protists+viruses                                 | RAD decay coefficient | -0.107   | 0.025      | <b>&lt;0.001</b> |
| Protists                                         |                       | -0.032   | 0.033      | 0.335            |
| Viruses                                          |                       | -0.074   | 0.029      | <b>0.012</b>     |
| Protists+viruses                                 | Evenness              | 0.037    | 0.009      | <b>&lt;0.001</b> |
| Protists                                         |                       | 0.013    | 0.011      | 0.237            |
| Viruses                                          |                       | 0.023    | 0.010      | <b>0.024</b>     |
| Protists+viruses                                 | Richness              | 21.993   | 8.026      | <b>0.009</b>     |
| Protists                                         |                       | 31.051   | 10.159     | <b>0.004</b>     |
| Viruses                                          |                       | -9.831   | 8.761      | 0.264            |

713



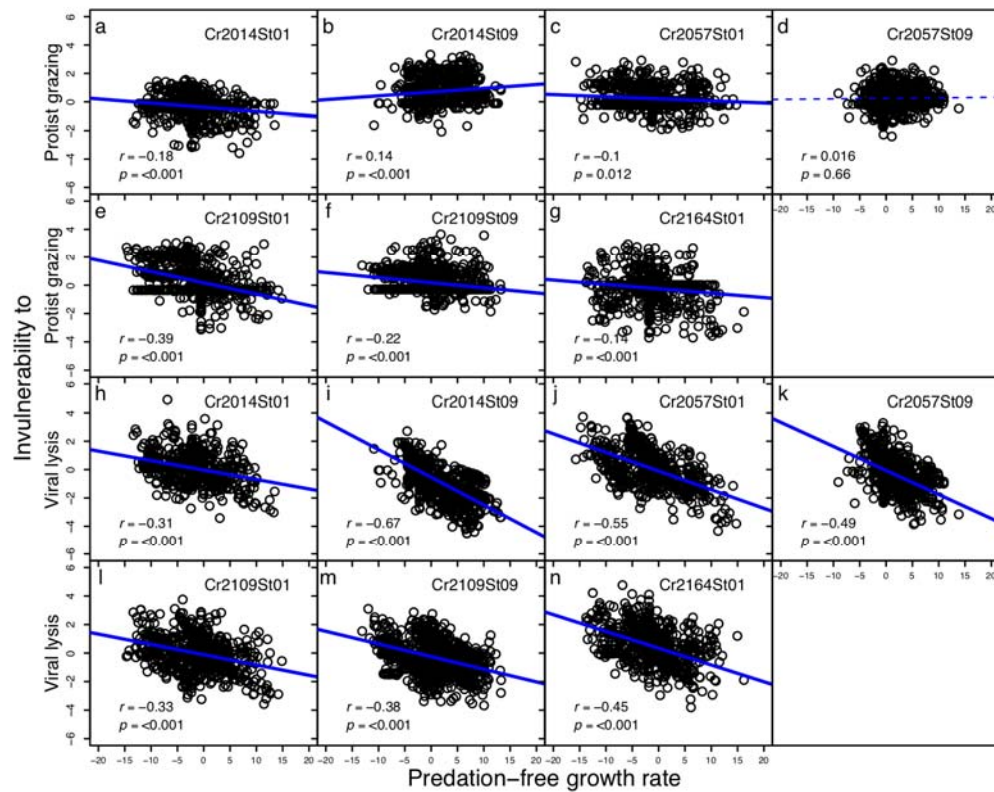

**Figure 1.** Relationships between predation-free growth rate (hour<sup>-1</sup>) and invulnerability to protists grazing or to viral lysis (hour<sup>-1</sup>), respectively, in each experiment. Values are the Pearson's correlation coefficient ( $r$ ) and its  $p$  value ( $p$ ). Solid and dashed lines indicate significant ( $p < 0.05$ ) and non-significant ( $p > 0.05$ ) linear regression, respectively.

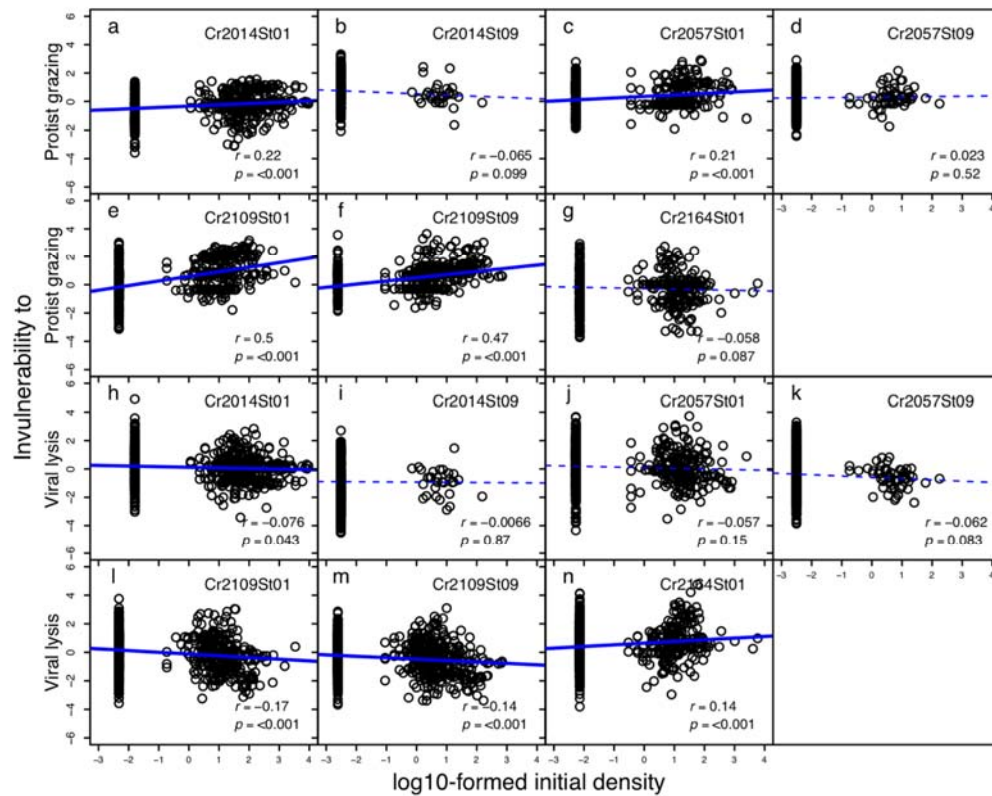

**Figure 2.** Relationships between  $\log_{10}$ -formed initial density and invulnerability to protist grazing or to viral lysis ( $\text{hour}^{-1}$ ), respectively, in each experiment. Values are the Pearson's correlation coefficient ( $r$ ) and its p value ( $p$ ). Solid and dashed lines indicate significant ( $p < 0.05$ ) and non-significant ( $p > 0.05$ ) linear regression, respectively.

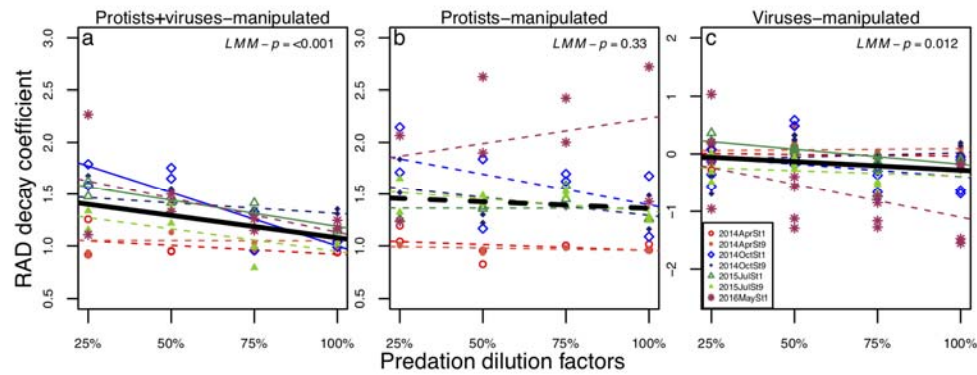

**Figure 3.** Relationships between predation dilution factors and bacterial RAD decay coefficient at T<sub>12</sub> under (a) protists+viruses-manipulated, (b) protists-manipulated and, (c) viruses-manipulated treatments. Colors or symbols indicate different sets of experiments. Solid and dashed lines indicate significant ( $p < 0.05$ ) and non-significant ( $p > 0.05$ ) linear regression, respectively. Black bold solid and dashed lines indicate significant ( $LMM-p < 0.05$ ) and non-significant ( $LMM-p > 0.05$ ) linear regression estimated from linear-mixed effect model, with experiments as the random effect.

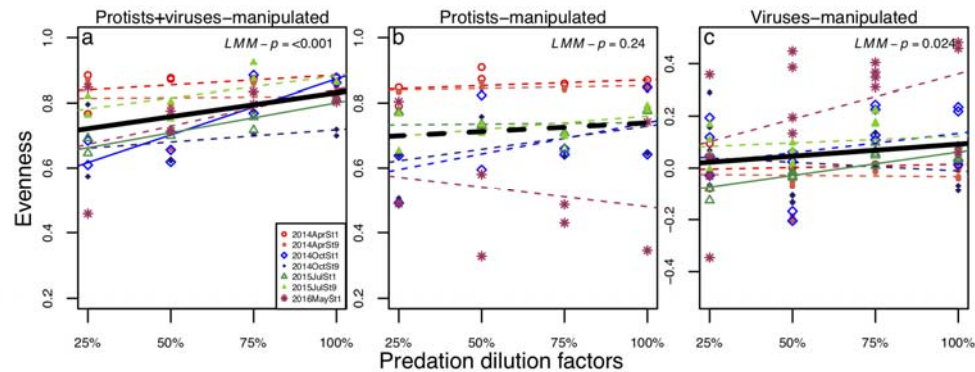

**Figure 4.** Relationships between predation dilution factors and bacterial evenness at  $T_{12}$  under (a) protists+viruses-manipulated, (b) protists-manipulated, and (c) viruses-manipulated treatments. Colors or symbols indicate different sets of experiments. Solid and dashed lines indicate significant ( $p < 0.05$ ) and non-significant ( $p > 0.05$ ) linear regression, respectively. Black bold solid and dashed lines indicate significant ( $LMM-p < 0.05$ ) and non-significant ( $LMM-p > 0.05$ ) linear regression estimated from linear-mixed effect model, with experiments as the random effect.

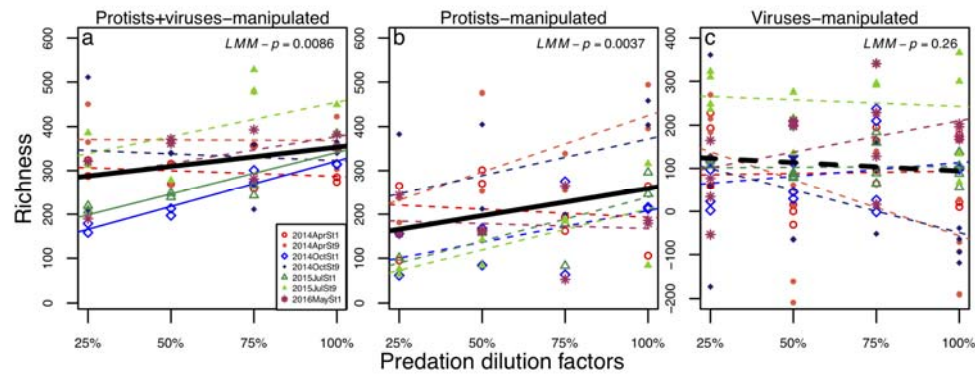

**Figure 5.** Relationships between predation dilution factors and bacterial richness at  $T_{12}$  under (a) protists+viruses-manipulated, (b) protists-manipulated, and (c) viruses-manipulated treatments. Colors or symbols indicate different sets of experiments. Solid and dashed lines indicate significant ( $p < 0.05$ ) and non-significant ( $p > 0.05$ ) linear regression, respectively. Black bold solid and dashed lines indicate significant ( $LMM-p < 0.05$ ) and non-significant ( $LMM-p > 0.05$ ) linear regression estimated from linear-mixed effect model, with experiments as the random effect.

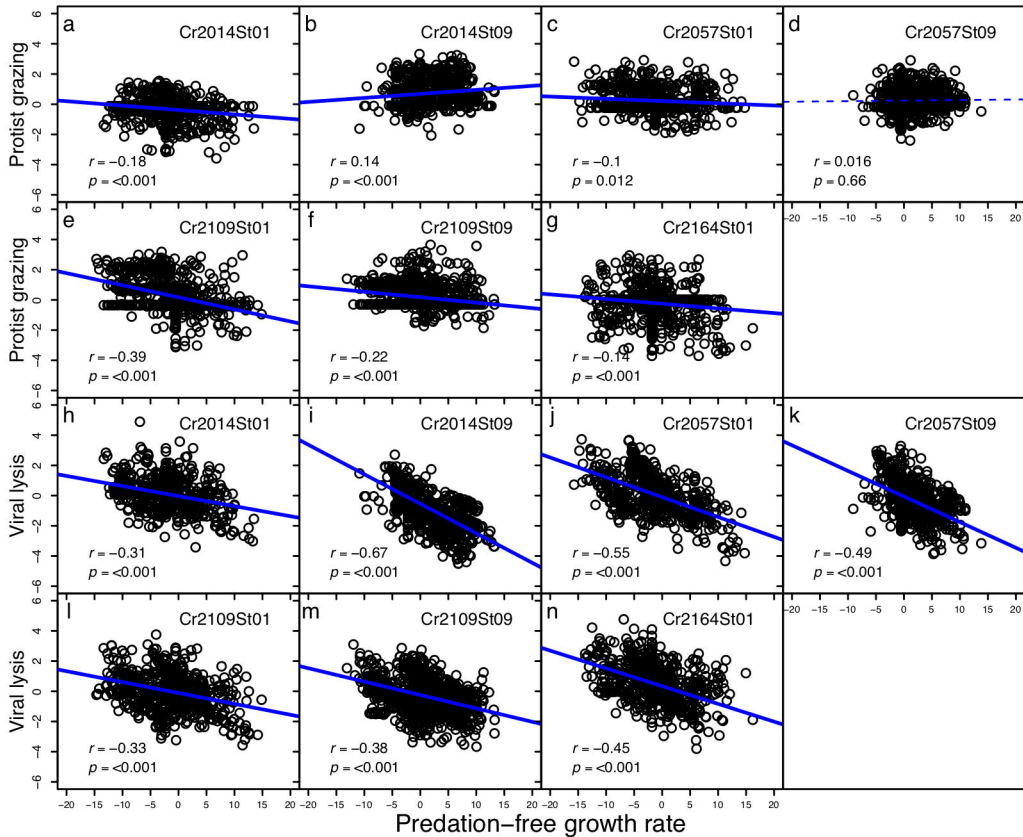

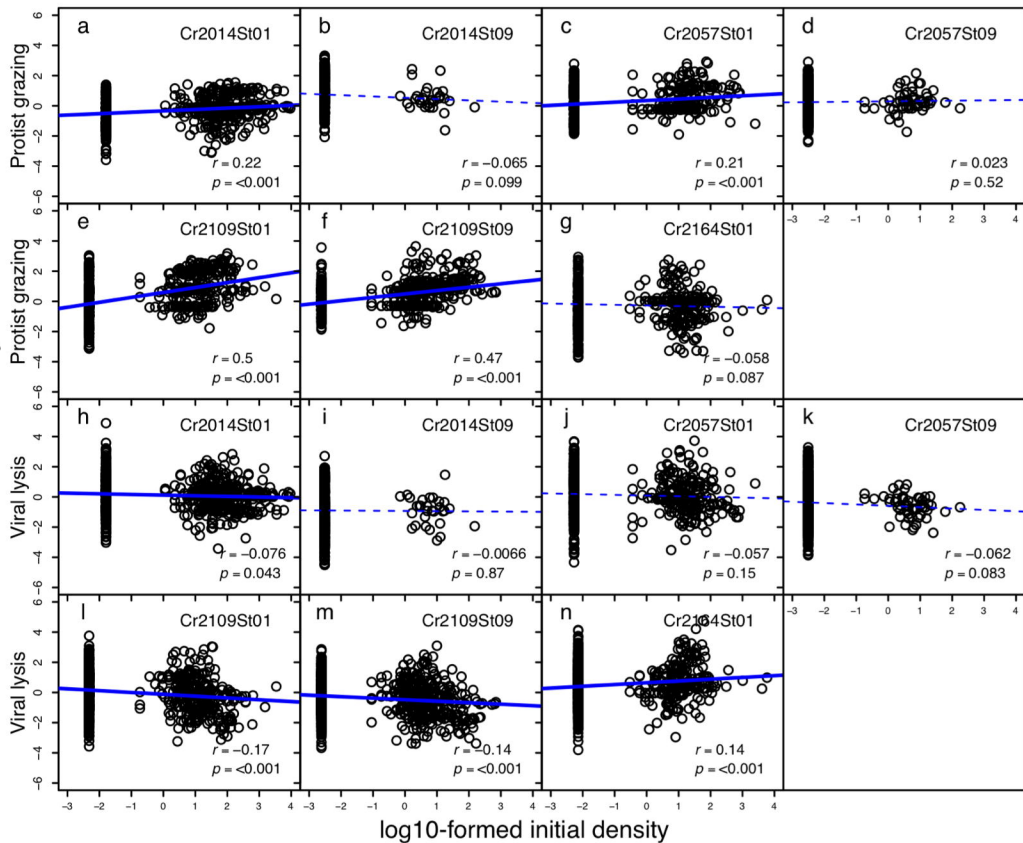

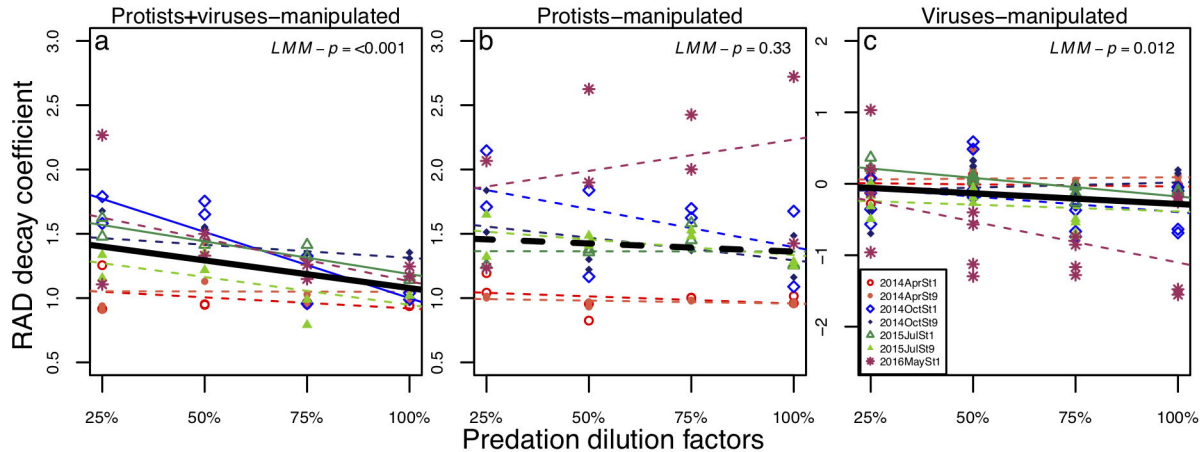



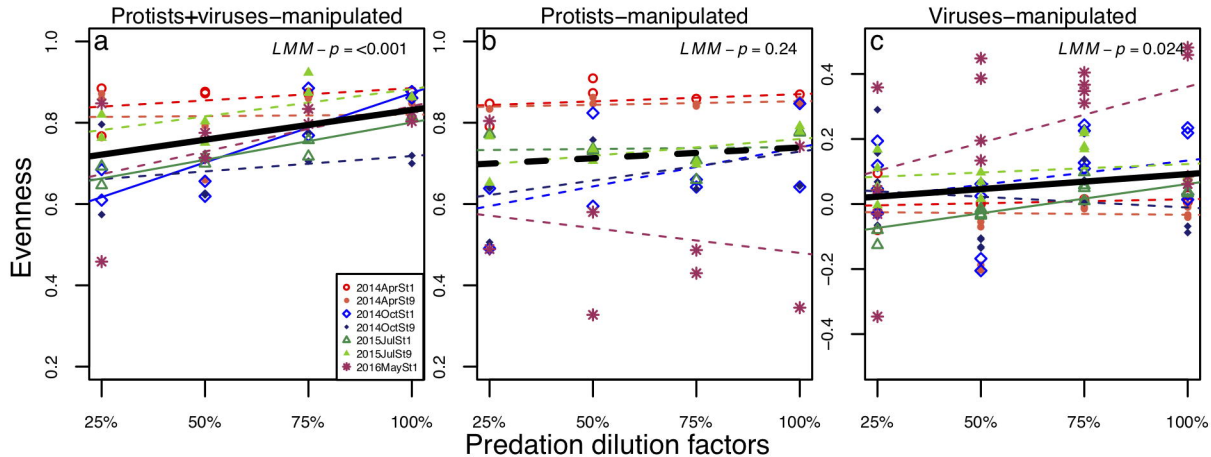

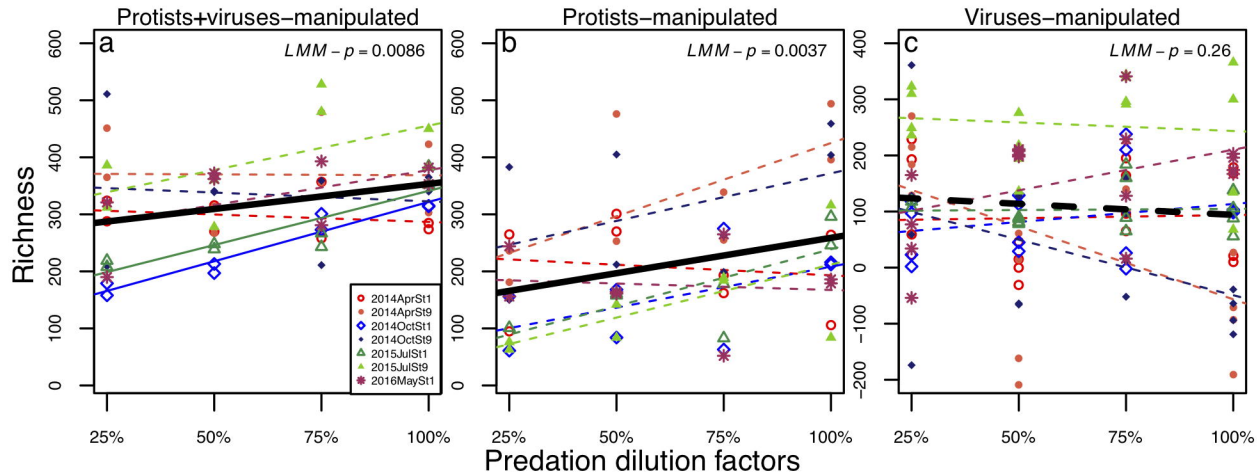

Source: http://biorxiv.org/content/10.1101/2021.10.09.463787v1.full.pdf
